# Supplementary material for: Assessment of Climate Change Impacts on the Water, Food, and Energy Sectors in Sittaung River Basin, Myanmar
Source: MDPI journal article supplement (doi:10.3390/w14213434), 2022-10-28
Supplement: s1 [file s1]

*Supplementary Material*

# Assessment of Climate Change Impacts on the Water, Food, and Energy Sectors in Sittaung River Basin, Myanmar

Uttam Ghimire <sup>1,\*</sup>, Thanapon Piman <sup>1,2</sup>, Manish Shrestha <sup>3</sup>, Anil Aryal <sup>4</sup>, and Chayanis Krittasudthacheewa <sup>1,2</sup>

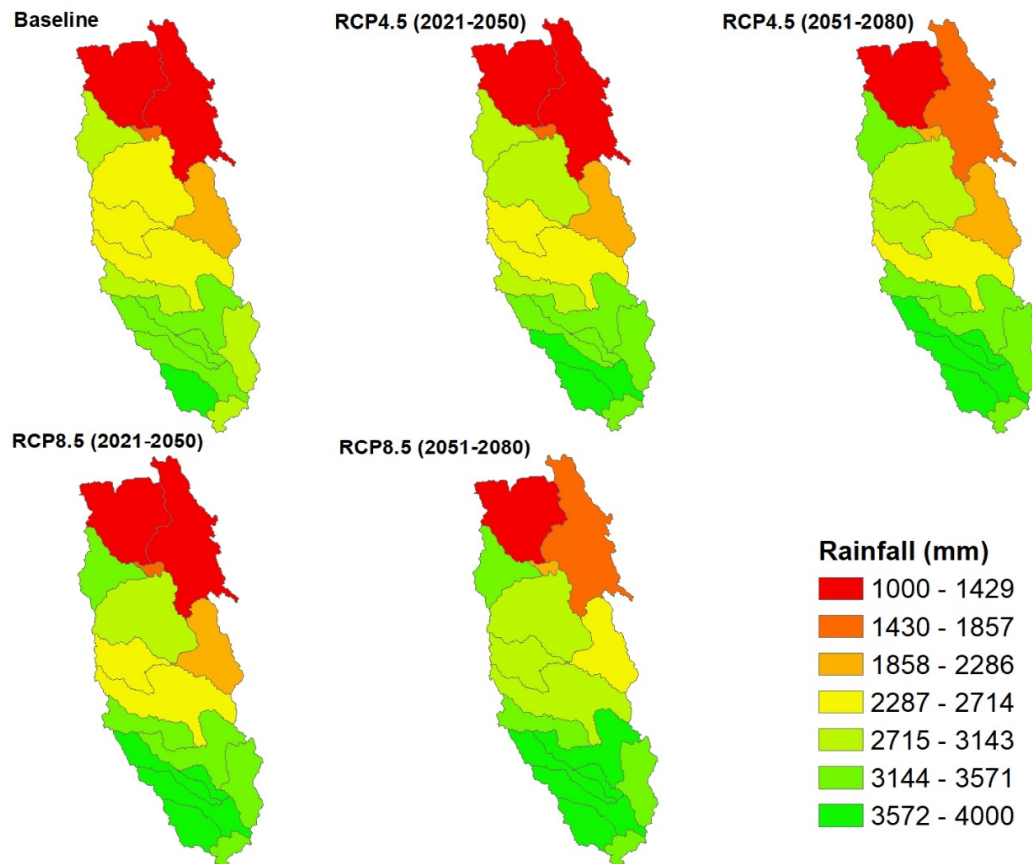

**Figure S1.** Baseline (1985–2014) and projected future rainfall for RCP4.5 and RCP8.5 scenarios in Sittaung river basin.

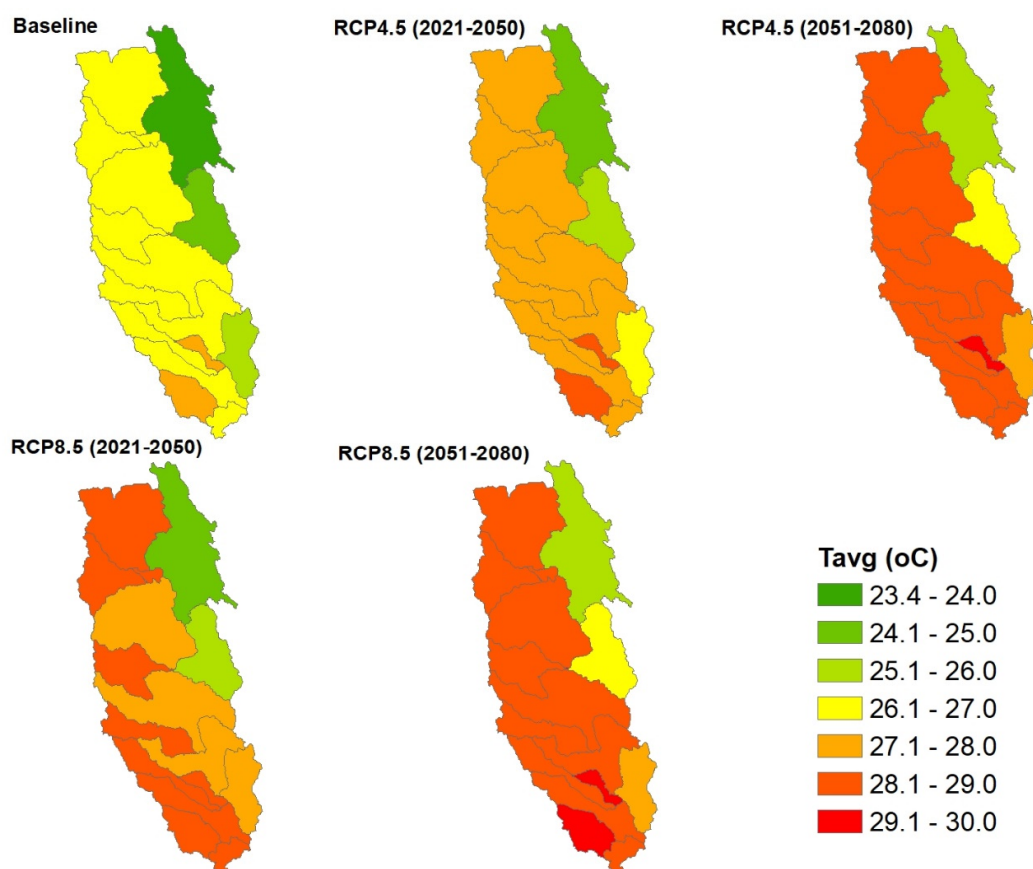

**Figure S2.** Baseline (1985–2014) and projected future average temperature for RCP4.5 and RCP8.5 scenarios in Sittaung river basin.

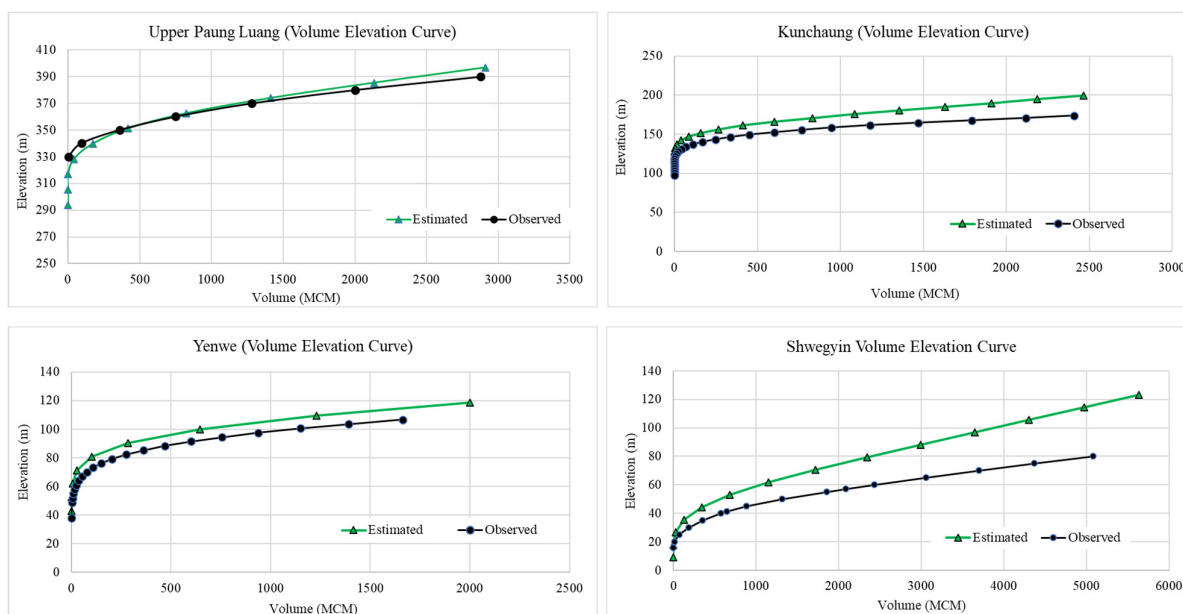

**Figure S3.** Observed and estimated volume elevation curves at the selected reservoirs in Sittaung.

**Table S1.** Python script to generate reservoir volume elevation curve.

---

```

import pandas as pd
import numpy as np
import rasterio
import matplotlib.pyplot as plt
from mpl_toolkits.axes_grid1 import make_axes_locatable
#Open a raster file
lakeRst = rasterio.open("C:\\Users\\12265\\OneDrive - SEI\\Sittaung_WEAP\\0_Raw\\Reser-
voir\\Kabaung\\KabaungUTM47.tif")
lakeRst.count
lakeRst.res
lakeRst.crs.wkt
lakeBottom=lakeRst.read(1)
lakeBottom[:,1:]
#replace value for np.nan
noDataValue = np.copy(lakeBottom[0,0])
lakeBottom[lakeBottom==noDataValue]= np.nan
plt.figure(figsize=(12,12))
plt.imshow(lakeBottom)
plt.show()
#Lake volume calculation
minElev = np.nanmin(lakeBottom)
maxElev = np.nanmax(lakeBottom)
print('Min bottom elevation %.2f m., max bottom elevation %.2f m.'%(minElev,maxElev))
#steps for calculation
nSteps = 50
# lake bottom elevation intervals
elevSteps = np.round(np.linspace(minElev,maxElev,nSteps),2)
elevSteps

# definition of volume function
def calculateVol(elevStep,elevDem,lakeRst):
    tempDem = elevStep - elevDem[elevDem<elevStep]
    tempVol = tempDem.sum()*lakeRst.res[0]*lakeRst.res[1]
    return tempVol
# calculate volumes for each elevation
volArray = []
for elev in elevSteps:
    tempVol = calculateVol(elev,lakeBottom,lakeRst)
    volArray.append(tempVol)
print("Lake bottom elevations %s"%elevSteps)
volArrayMCM = [round(i/1000000,2) for i in volArray]
print("Lake volume in million of cubic meters %s"%volArrayMCM)
# plot values
fig, ax = plt.subplots(figsize=(12,5))
ax.plot(volArrayMCM,elevSteps,label='Kabaung')
ax.grid()
ax.legend()
ax.set_xlabel('Volume MCM')
ax.set_ylabel('Elevation (masl)')
plt.show()

```

---

---

```
# plot values
fig, [ax1, ax2] = plt.subplots(1,2,figsize=(20,10),gridspec_kw={'width_ratios': [2, 1]})
ax1.set_title('Kabaung elevation')
botElev = ax1.imshow(lakeBottom)
divider = make_axes_locatable(ax1)
cax = divider.append_axes('bottom', size='5%', pad=0.5)
fig.colorbar(botElev, cax=cax, orientation='horizontal', label='Elevation (masl)')

ax2.plot(volArrayMCM,elevSteps,label='Kabaung reservoir')
ax2.grid()
ax2.legend()
ax2.set_xlabel('Volume MCM')
ax2.set_ylabel('Elevation (masl)')
plt.show()
elevSteps
volArrayMCM
data= pd.DataFrame(elevSteps,volArrayMCM)
data.to_csv("C:\\Users\\12265\\OneDrive - SEI\\Sittaung_WEAP\\0_Raw\\Reservoir\\Kabaung\\KabaungElevVol1.csv")
```

---
